# Supplementary material
Source: PubMed Central journal article supplement (PMC4261994)
Supplement: bm501419z_si_001.pdf [file bm501419z_si_001.pdf]

## SUPPORTING INFORMATION

Table S1. Particle characterization

| Particle type | Diameter (nm) | $\zeta$ -potential (mV) |
|---------------|---------------|-------------------------|
| 200 nm PS     | $193 \pm 3$   | $-55.0 \pm 2.8$         |
| 200 nm PS-PEG | $232 \pm 4$   | $-1.9 \pm 0.2$          |
| 500 nm PS     | $485 \pm 1$   | $-57.7 \pm 1.1$         |
| 500 nm PS-PEG | $500 \pm 2$   | $-8.0 \pm 0.4$          |
| PLGA/1% F127  | $112 \pm 1$   | $-5.9 \pm 0.8$          |
